# Supplementary material
Source: publisher site journal article supplement (https://www.kjim.org/upload/media/kjim-2022-173-suppl2.pdf)
Supplement: Supplementary file 1 [file kjim-2022-173-suppl2.pdf]

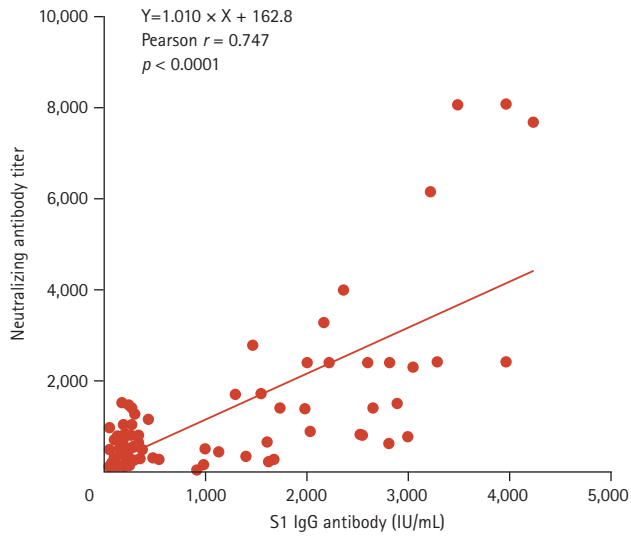

**Supplementary Figure 1.** Correlation between severe acute respiratory syndrome coronavirus 2 (SARS-CoV-2) virus neutralizing antibody titer and SARS-CoV-2 spike 1 (S1) protein specific immunoglobulin G (IgG) antibody titer.
